# Supplementary material
Source: PubMed Central journal article supplement (PMC3625313)
Supplement: 1222607110_pnas.201222607SI.pdf [file 1222607110_pnas.201222607SI.pdf]

# Supporting Information

Keller et al. 10.1073/pnas.1222607110

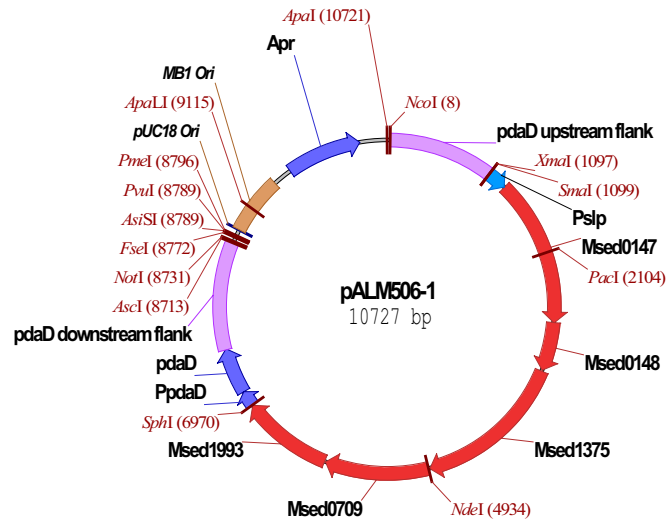

Fig. S1. Plasmid map of pALM506-1 used to transform the *Pyrococcus furiosus* arginine decarboxylase deletion strain  $\Delta$ pdaD to generate strain PF506.

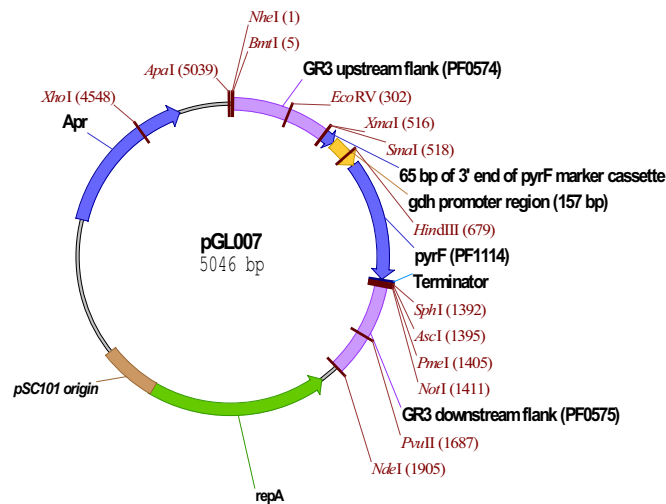

Fig. S2. Plasmid map of pGL007 vector targeting the region between the loci PF0574 and PF0575 in the *P. furiosus* genome.



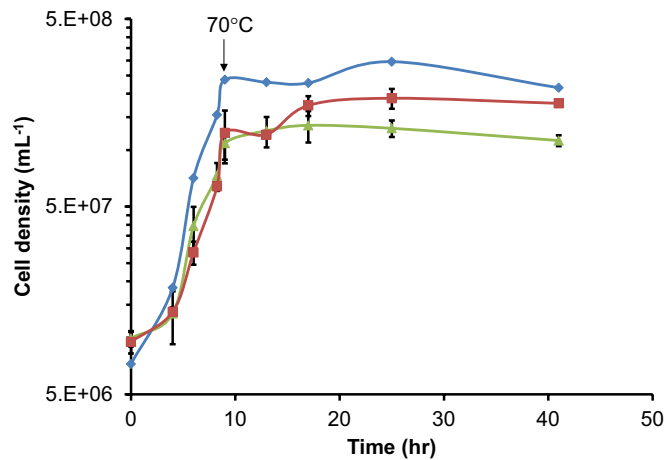

**Fig. 56.** Growth of *P. furiosus* COM1, MW56, and PF506 during the temperature shift from 98°C to 70°C. Cell densities of COM1 (blue diamonds), MW0056 (red squares), and PF506 (green triangles) are indicated. The 400-mL cultures were grown at 95°C for 9 h and then allowed to cool at room temperature to 70°C before being placed in a 70°C incubator.

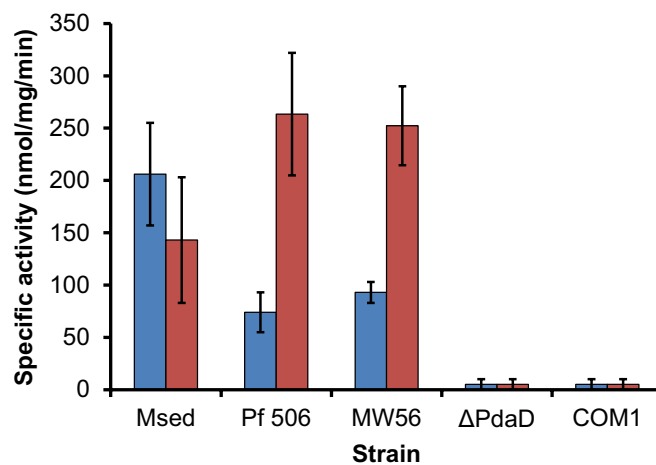

**Fig. 57.** Enzyme activities of E1 (blue) and coupled E2 + E3 (red) in cell-free extracts of the indicated *P. furiosus* strains after incubation at 70°C for 16 h compared with that measured for the cell extract of autotrophically grown *Metallosphaera sedula* cells (labeled Msed).

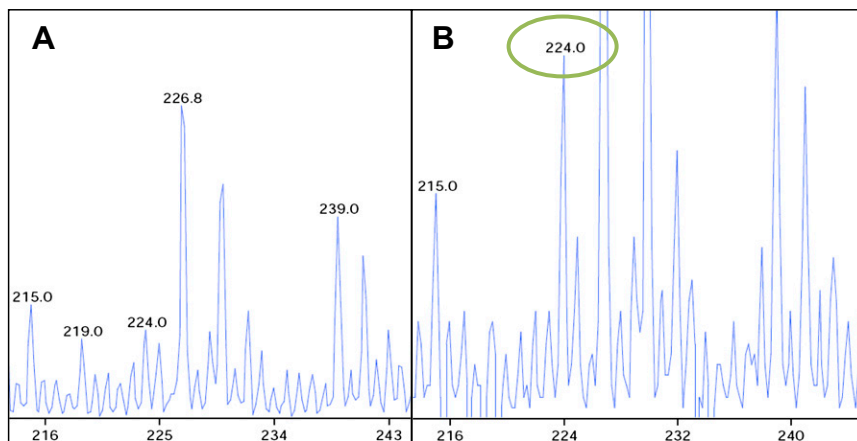

**Fig. 58.** Electrospray ionization mass spectrometry identification of 3-hydroxypropionic acid produced from acetyl coenzyme A (acetyl-CoA), CO<sub>2</sub>, and H<sub>2</sub> (or NADPH) by cell-free extracts of *P. furiosus* strains ΔpdaD (A) and PF506 (B). The MS peak corresponding to the 3-HP derivative (*m/z* 224, green circle) was present above background only in the recombinant PF506 strain.

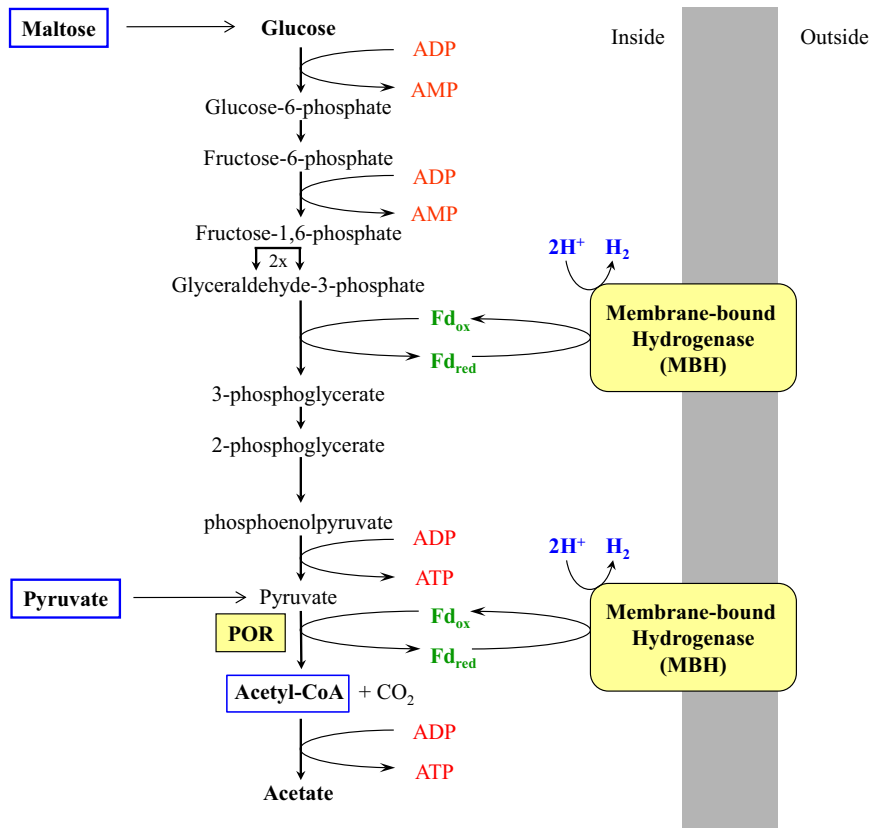

Fig. S9. Maltose and pyruvate metabolism by *P. furiosus* and the key roles of pyruvate ferredoxin oxidoreductase (POR) in acetyl-CoA production and of the membrane-bound hydrogenase in H<sub>2</sub> production.

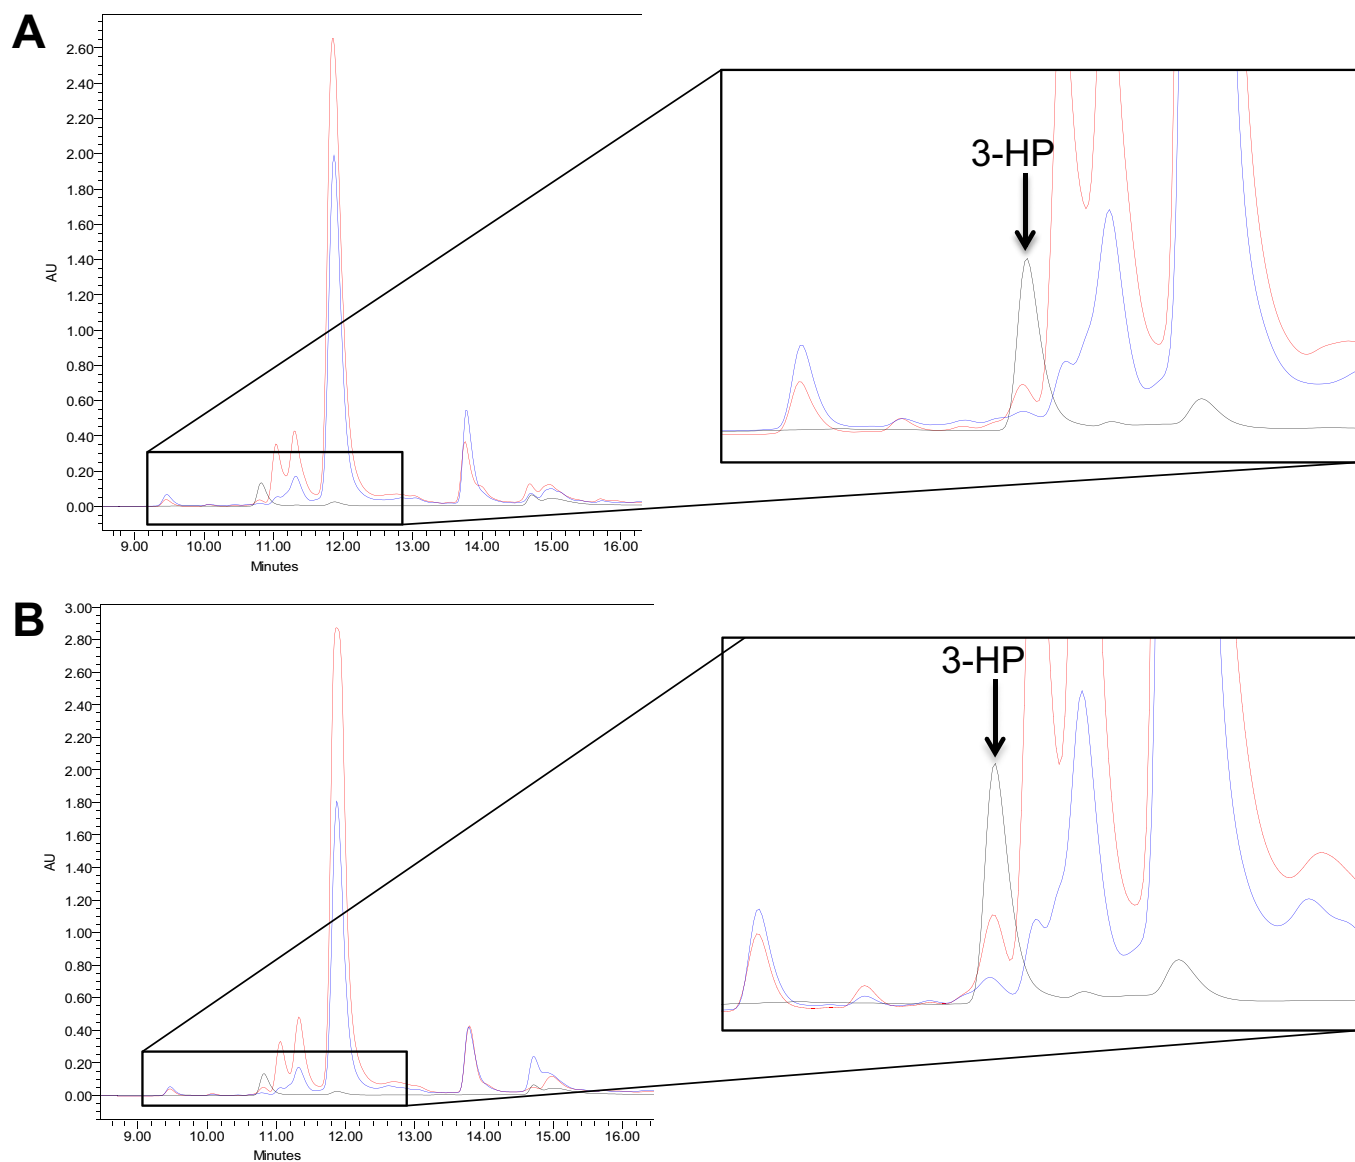

**Fig. S10.** In vivo production of 3-hydroxypropionic acid (3-HP) from maltose by whole cells of *P. furiosus* strain MW56 (A) and PF506 (B) after 10 min (blue) and 60 min (red) compared with a 1-mM 3-HP standard (black). A black arrow indicates the position of the 3-HP peaks. A total of 135  $\mu\text{M}$  and 199  $\mu\text{M}$  3-HP was produced by cell suspensions of MW56 ( $5 \times 10^{10}$  cells/mL) and PF506 ( $5 \times 10^{10}$  cells/mL), respectively, after 60 min at 75°C.

**Table S1. Strains used and constructed in this study**

| Strain        | Parent        | Genotype/description                                                 | Source    |
|---------------|---------------|----------------------------------------------------------------------|-----------|
| COM1          | DSM 3638      | $\Delta pyrF$                                                        | (1)       |
| $\Delta pdaD$ | COM1          | $\Delta pyrF \Delta pdaD::P_{gdh}pyrF$                               | (2)       |
| PF506         | $\Delta pdaD$ | $\Delta pyrF \Delta pdaD::pdaD P_{slp}^- E1\alpha\beta\gamma$ -E2-E3 | This work |
| MW56          | COM1          | $\Delta pyrF P_{gdh}pyrF P_{slp}^- E1\alpha\beta\gamma$ -E2-E3       | This work |

E1 $\alpha\beta\gamma$ , acetyl/propionyl-CoA carboxylase; E2, malonyl/succinyl-CoA reductase; E3, malonate semialdehyde reductase; *gdh*, glutamate dehydrogenase; *pdaD*, arginine decarboxylase;  $P_{slp}$ , *P. furiosus* S-layer gene promoter; *pyrF*, orotidine-5'-phosphate decarboxylase.

1. Lipscomb GL, et al. (2011) Natural competence in the hyperthermophilic archaeon *Pyrococcus furiosus* facilitates genetic manipulation: Construction of markerless deletions of genes encoding the two cytoplasmic hydrogenases. *Appl Environ Microbiol* 77(7):2232–2238.
2. Hopkins RC, et al. (2011) Homologous expression of a subcomplex of *Pyrococcus furiosus* hydrogenase that interacts with pyruvate ferredoxin oxidoreductase. *PLoS ONE* 6(10):e26569.

**Table S2. Gas chromatography–mass spectrometry identification and quantitation of 3-hydroxypropionic acid produced from malonyl-CoA and NADPH or H<sub>2</sub> by cell-free extracts of *P. furiosus* strain PF506**

| Vial | Added electron donor       | Substrate        | Theoretical 3-HP, mM | 3-HP/inositol peak area | Estimated 3-hydroxypropionic acid, mM |
|------|----------------------------|------------------|----------------------|-------------------------|---------------------------------------|
| 1    | 2 mM NADPH                 | 2 mM malonyl-CoA | 1                    | 0.0288                  | 0.2                                   |
| 2    | 2 mM NADPH, H <sub>2</sub> | 2 mM malonyl-CoA | 2                    | 0.0467                  | 0.3                                   |
| 3    | 1 mM NADP, H <sub>2</sub>  | 2 mM malonyl-CoA | 2                    | 0.0274                  | 0.2                                   |
| 4    | 1 mM NADP, H <sub>2</sub>  | None (control)   | 0                    | 0.0064                  | 0.05                                  |
| 5    | 1 mM NADP, H <sub>2</sub>  | None (control)   | 2                    | 0.2839                  | 2.0                                   |

The assays were carried out in a total volume of 1 mL containing 0.25 mg cell-free extract under H<sub>2</sub> in a shaking water bath. The amount of 3-hydroxypropionic acid produced was determined after 2 h at 72°C.

**Table S3. 3-Hydroxypropionic acid production by whole cells using maltose or pyruvate as the source of acetyl-CoA**

| <i>P. furiosus</i> strain | Pyruvate | Maltose  |
|---------------------------|----------|----------|
| MW56                      | 155 nmol | 100 nmol |
| PF506                     | 70 nmol  | 145 nmol |

The amount of 3-hydroxypropionic acid indicated was present in 1 mL of the *P. furiosus* cell suspension.

**Table S4. Primers used in the construction of the synthetic subpathway 1 operon**

| Primer target                       | Direction | 5' to 3' sequence                                     |
|-------------------------------------|-----------|-------------------------------------------------------|
| <i>P. furiosus</i> S-layer promoter | Forward   | GAATCCCCGCGGCCCGGGCTGGCAGAATAGAA                      |
|                                     | Reverse   | GCAACCAAACTCTACTAAAGGGTGGCATTTCCTCCACCTCCCAATAATCTG   |
| Msed_0147-0148                      | Forward   | ATGCCACCCTTTAGTAGAGTTTTGG                             |
|                                     | Reverse   | GTTGCAGTCATCTTCAAACCTCCTTACTTTATCACCCTAGGATATCTCC     |
| Msed1375                            | Forward   | GTGATAAAGTAAGGAGGTTTGAAGATGACTGCAACTTTTGAAAAACCGGAT   |
|                                     | Reverse   | CGTTCTCCTCATATGCTCCACCTCCCTTAGAGGGGTATATTCATGCTTC     |
| Msed_0709                           | Forward   | GGCAATGTCATATGAGGAGAACGCTAAAGGCCGCAATTC               |
|                                     | Reverse   | CCTTTTCAGTCATGTCATATCACCTCATCTCTGTCTATGTAGCCCTTC      |
| Msed_1993                           | Forward   | TAGACAAGAGATGAGGTGATATGCAATGACTGAAAAGGTATCTGTAGTTGGAG |
|                                     | Reverse   | CCAATGCATGCTTATTTTTCCCAAAGTATTGTATACCTTC              |
